# Supplementary material for: Tracing the history of LINE and SINE extinction in sigmodontine rodents
Source: PubMed Central journal article supplement (PMC6530004; doi:10.1186/s13100-019-0164-5), 2019-05-21
Supplement: 13100_2019_164_MOESM1_ESM.pdf [file 13100_2019_164_MOESM1_ESM.pdf]

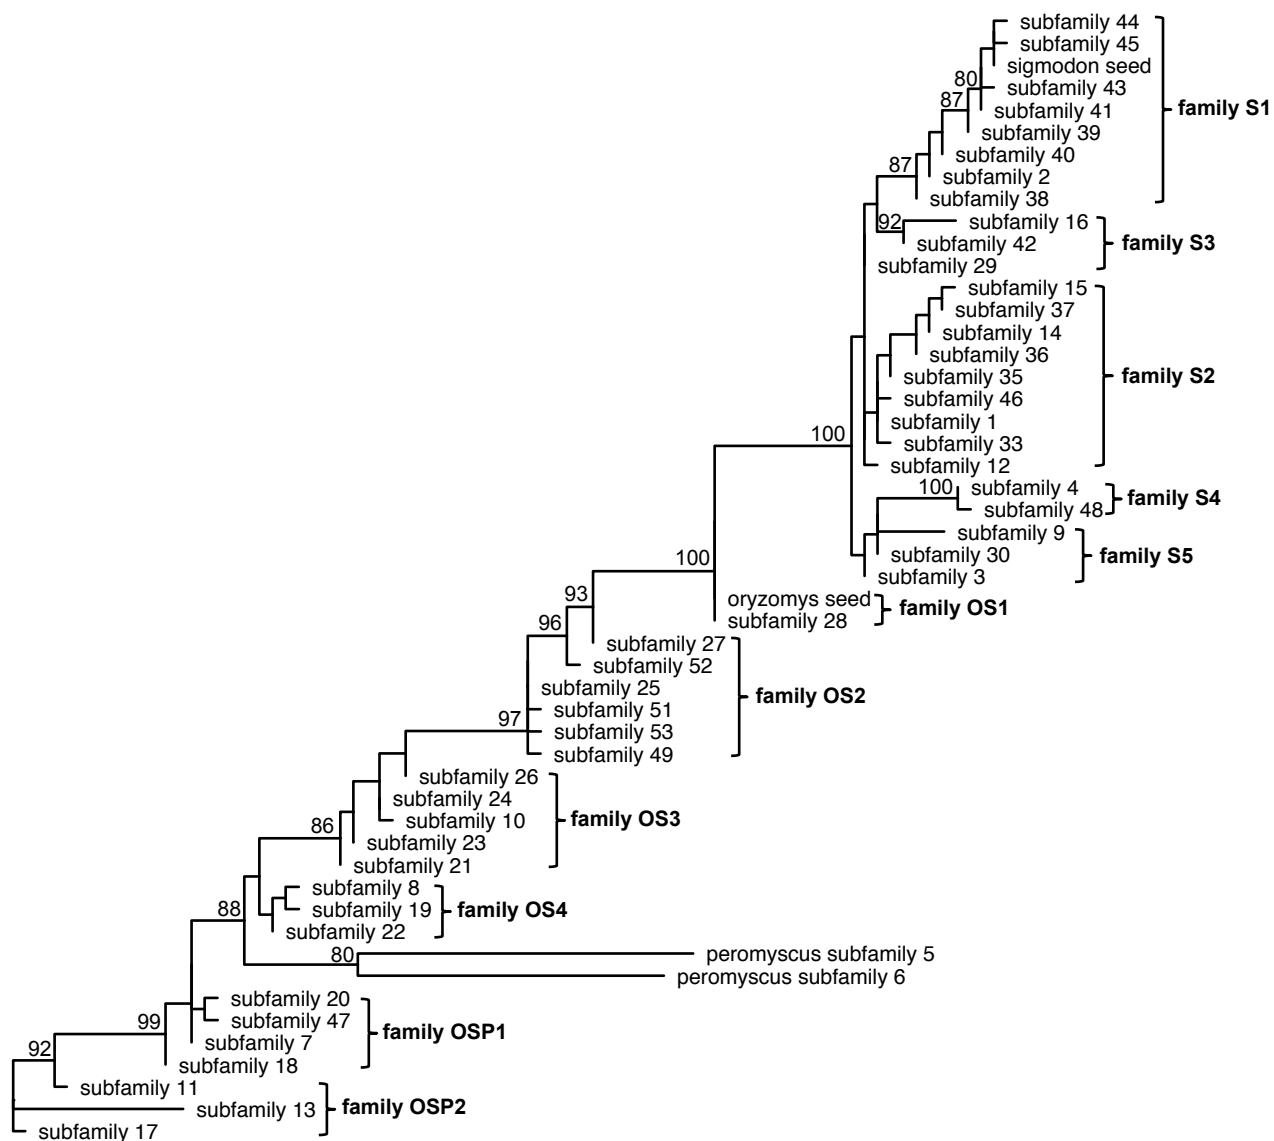

0.03
